# Supplementary material for: Clinical outcomes and cumulative healthcare costs of TAVR vs. SAVR in Asia
Source: Frontiers journal article supplement (doi:10.3389/fcvm.2022.973889), 2022-09-21
Supplement: Table_1.PDF [file Table_1.PDF]

## **Supplementary materials**

**Supplemental Table 1.** Description of ICD codes from claims

**Supplemental Table 2.** Description of ATC order codes from claims

**Supplemental Table 3.** In-hospital and 30-day mortality between TAVR and SAVR after propensity score overlap weighting

**Supplementary Figure 1.** Landmark analysis: primary and secondary outcomes from the first year after surgery, including HHF (A), CV death (B), MACE (C), and all-cause mortality (D).

**Supplemental Table 1.** Description of ICD codes from claims

| <b>Disease/Outcome</b> | <b>ICD-9 Code</b> | <b>ICD-10 Code</b> | <b>Description</b>                                                                |
|------------------------|-------------------|--------------------|-----------------------------------------------------------------------------------|
| Aortic stenosis        | 395.0             | I06.0              | Rheumatic aortic stenosis                                                         |
|                        | 395.2             | I06.2              | Rheumatic aortic stenosis with insufficiency                                      |
|                        | 396.0             |                    | Mitral valve stenosis and aortic valve stenosis                                   |
|                        | 396.2             |                    | Mitral valve insufficiency and aortic valve stenosis                              |
|                        |                   | I08.0              | Rheumatic disorders of both mitral and aortic valves                              |
|                        | 424.1             |                    | Aortic valve disorders                                                            |
|                        |                   | I35.0              | Nonrheumatic aortic (valve) stenosis                                              |
|                        |                   | I35.2              | Nonrheumatic aortic (valve) stenosis with insufficiency                           |
|                        | 746.3             | Q23.0              | Congenital stenosis of aortic valve                                               |
| Hypertension           | 401               | I10                | Essential (primary) hypertension                                                  |
|                        | 402               | I11                | Hypertensive heart disease                                                        |
|                        | 403               | I12                | Hypertensive chronic kidney disease with chronic kidney disease or renal disease  |
|                        | 404               | I13                | Hypertensive heart and chronic kidney disease with heart failure or renal disease |
|                        | 405               | I15<br>N26.2       | Secondary hypertension                                                            |
| Heart failure          | 398.91            | I09.81             | Rheumatic heart failure (congestive)                                              |
|                        | 402.01            |                    | Malignant hypertensive heart disease with congestive heart failure                |
|                        | 402.11            |                    | Benign hypertensive heart disease with congestive heart failure                   |
|                        | 402.91            |                    | Unspecified hypertensive heart disease with congestive heart failure              |
|                        |                   | I11.0              | Hypertensive heart disease with heart failure                                     |

| Disease/Outcome       | ICD-9 Code | ICD-10 Code | Description                                                                                                                                                |
|-----------------------|------------|-------------|------------------------------------------------------------------------------------------------------------------------------------------------------------|
|                       | 404.01     |             | Malignant hypertensive heart and renal disease with congestive heart failure                                                                               |
|                       | 404.03     |             | Malignant hypertensive heart and renal disease with congestive heart failure and renal failure                                                             |
|                       | 404.11     |             | Benign hypertensive heart and renal disease with congestive heart failure                                                                                  |
|                       | 404.13     |             | Benign hypertensive heart and renal disease with congestive heart failure and renal failure                                                                |
|                       | 404.91     |             | Unspecified hypertensive heart and renal disease with congestive heart failure                                                                             |
|                       | 404.93     |             | Unspecified hypertensive heart and renal disease with congestive heart failure and renal failure                                                           |
|                       |            | I13.0       | Hypertensive heart and chronic kidney disease with heart failure and stage 1 through stage 4 chronic kidney disease, or unspecified chronic kidney disease |
|                       |            | I13.2       | Hypertensive heart and chronic kidney disease with heart failure and with stage 5 chronic kidney disease, or end stage renal disease                       |
|                       | 428.x      | I50.x       | Congestive heart failure                                                                                                                                   |
| Myocardial infarction | 410.x1     | I21-I22     | Acute myocardial infarction                                                                                                                                |
| Stroke                | 430        | I60         | Subarachnoid hemorrhage                                                                                                                                    |
|                       | 431        | I61         | Intracerebral hemorrhage                                                                                                                                   |
|                       | 433        | I63         | Occlusion and stenosis of artery                                                                                                                           |
|                       | 434        | I63         | Cerebral thrombosis, cerebral embolism or cerebral artery occlusion                                                                                        |
|                       | 435        | G45         | Artery syndrome or transient cerebral ischemia                                                                                                             |
|                       | 436        | I67.89      | Other cerebrovascular disease                                                                                                                              |
| Cardiovascular        |            | I00         | Rheumatic fever without heart                                                                                                                              |

| <b>Disease/Outcome</b> | <b>ICD-9<br/>Code</b> | <b>ICD-10<br/>Code</b> | <b>Description</b>                                                             |
|------------------------|-----------------------|------------------------|--------------------------------------------------------------------------------|
| causes of death        |                       |                        | involvement                                                                    |
|                        |                       | I01                    | Acute rheumatic heart disease                                                  |
|                        |                       | I02                    | Rheumatic chorea                                                               |
|                        |                       | I05-I09                | Rheumatic valve disease or rheumatic heart disease                             |
|                        |                       | I10-I15                | Hypertensive disease                                                           |
|                        |                       | I20-I25                | Ischemic heart disease                                                         |
|                        |                       | I26-I28                | Pulmonary heart disease and pulmonary vascular disease                         |
|                        |                       | I30-I52                | Other forms of heart disease                                                   |
|                        |                       | I60-I69                | Cerebrovascular disease                                                        |
|                        |                       | I70-I79                | Diseases of arteries, arterioles and capillaries                               |
|                        |                       | I80-I89                | Diseases of veins, lymphatic vessels and lymph nodes, not elsewhere classified |
|                        |                       | I95-I99                | Other and unspecified disorders of the circulatory system                      |

**Supplemental Table 2.** Description of ATC order codes from claims

| Medication                                    | ATC code                                  | Description                                                                   |
|-----------------------------------------------|-------------------------------------------|-------------------------------------------------------------------------------|
| Statin                                        | C10AA                                     | HMG CoA reductase inhibitors                                                  |
|                                               | C10BA                                     | HMG CoA reductase inhibitors in combination with other lipid modifying agents |
|                                               | C10BX                                     | HMG CoA reductase inhibitors, other combinations                              |
| Other lipid-lowering drugs, excluding statins | C10<br>(Excluding C10AA, C10BA and C10BX) | Lipid modifying agents                                                        |
| Antiplatelet                                  | B01AC06                                   | Acetylsalicylic acid                                                          |
|                                               | B01AC04                                   | Clopidogrel                                                                   |
|                                               | B01AC22                                   | Prasugrel                                                                     |
|                                               | B01AC05                                   | Ticlopidine <sup>1,3,4</sup>                                                  |
|                                               | B01AC07                                   | Dipyridamole                                                                  |
|                                               | B01AC23                                   | Ccilostazol <sup>1,2,4</sup>                                                  |
|                                               | B01AC24                                   | Ticagrelor                                                                    |
| Anticoagulants                                | B01AA03                                   | Warfarin                                                                      |
|                                               | B01AE07                                   | Dabigatran etexilate                                                          |
|                                               | B01AF01                                   | Rivaroxaban                                                                   |
|                                               | B01AF02                                   | Apixaban                                                                      |
| NSAIDs                                        | M01A                                      | Antiinflammatory and antirheumatic products, non-steroids                     |
| ACE inhibitor                                 | C09A                                      | Ace inhibitors, plain                                                         |
|                                               | C09B                                      | Ace inhibitors, combinations                                                  |
| ARB                                           | C09C                                      | Angiotensin II antagonists, plain                                             |
|                                               | C09D                                      | Angiotensin II antagonists, combinations                                      |
| Beta blocker                                  | C07                                       | Beta blocking agents                                                          |
| Calcium channel blocker                       | C08                                       | Calcium channel blockers                                                      |
|                                               | C07FB                                     | Beta blocking agents and calcium channel blockers <sup>1,2,4</sup>            |
|                                               | C09BB                                     | ACE inhibitors and calcium channel blockers <sup>3</sup>                      |
|                                               | C09DB                                     | Angiotensin II antagonists and calcium channel blockers                       |

| Medication     | ATC code | Description                      |
|----------------|----------|----------------------------------|
| Thiazides      | C03A     | Low-ceiling diuretics, thiazides |
| Loop diuretics | C03C     | High-ceiling diuretics           |
| Metformin      | A10BA02  | Metformin                        |
| Insulin        | A10AD    | Insulin                          |

**Supplemental Table 3.** In-hospital and 30-day mortality between TAVR and SAVR after propensity score overlap weighting

|                       | TAVR group   |      | SAVR group   |       |
|-----------------------|--------------|------|--------------|-------|
|                       | No. of event | %    | No. of event | %     |
| In-hospital mortality | 14           | 3.83 | 41           | 10.92 |
| 30-day mortality      | 8            | 2.26 | 30           | 8.08  |

A. Hospitalization due to heart failure (HHF)

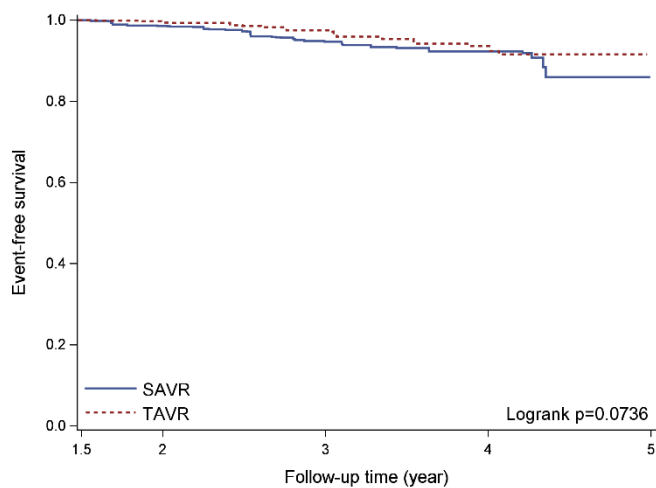

B. Cardiovascular (CV) death

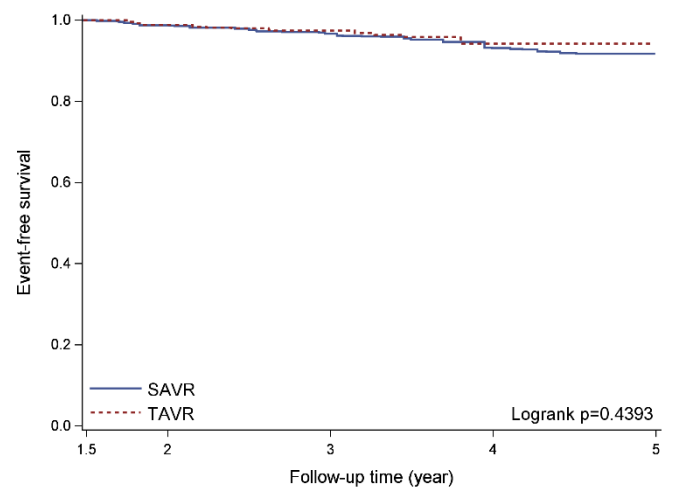

C. Major adverse cardiac event (MACE)

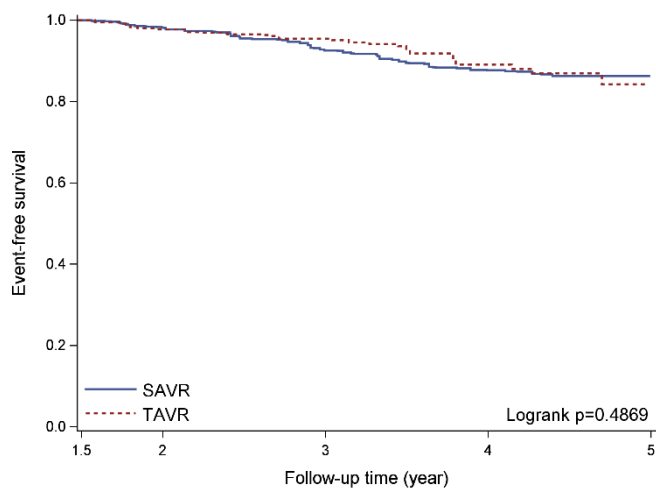

D. All-cause mortality (ACM)

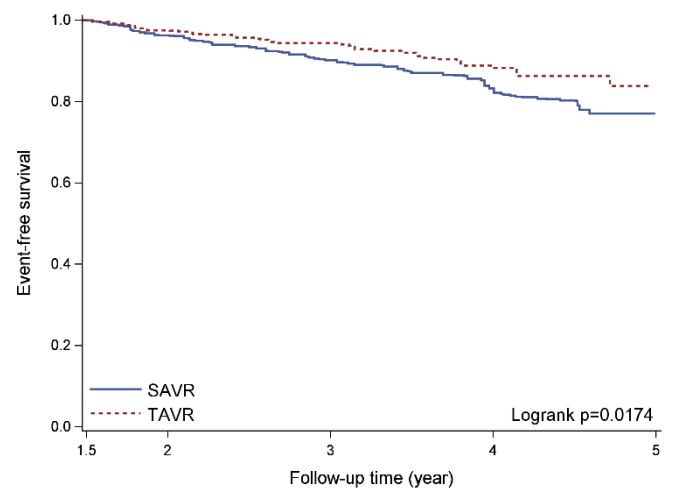

**Supplementary Figure 1.** Landmark analysis: primary and secondary outcomes from the 18 months after surgery, including Hospitalization due to heart failure (A), Cardiovascular (CV) death (B), C. Major adverse cardiac event (MACE) (C), and all-cause mortality (ACM) (D).
